# Supplementary material for: Characterization of Sex Determination and Sex Differentiation Genes in Latimeria
Source: PubMed Central journal article supplement (PMC3636272; doi:10.1371/journal.pone.0056006), 2013-04-25

# A Male sex development genes

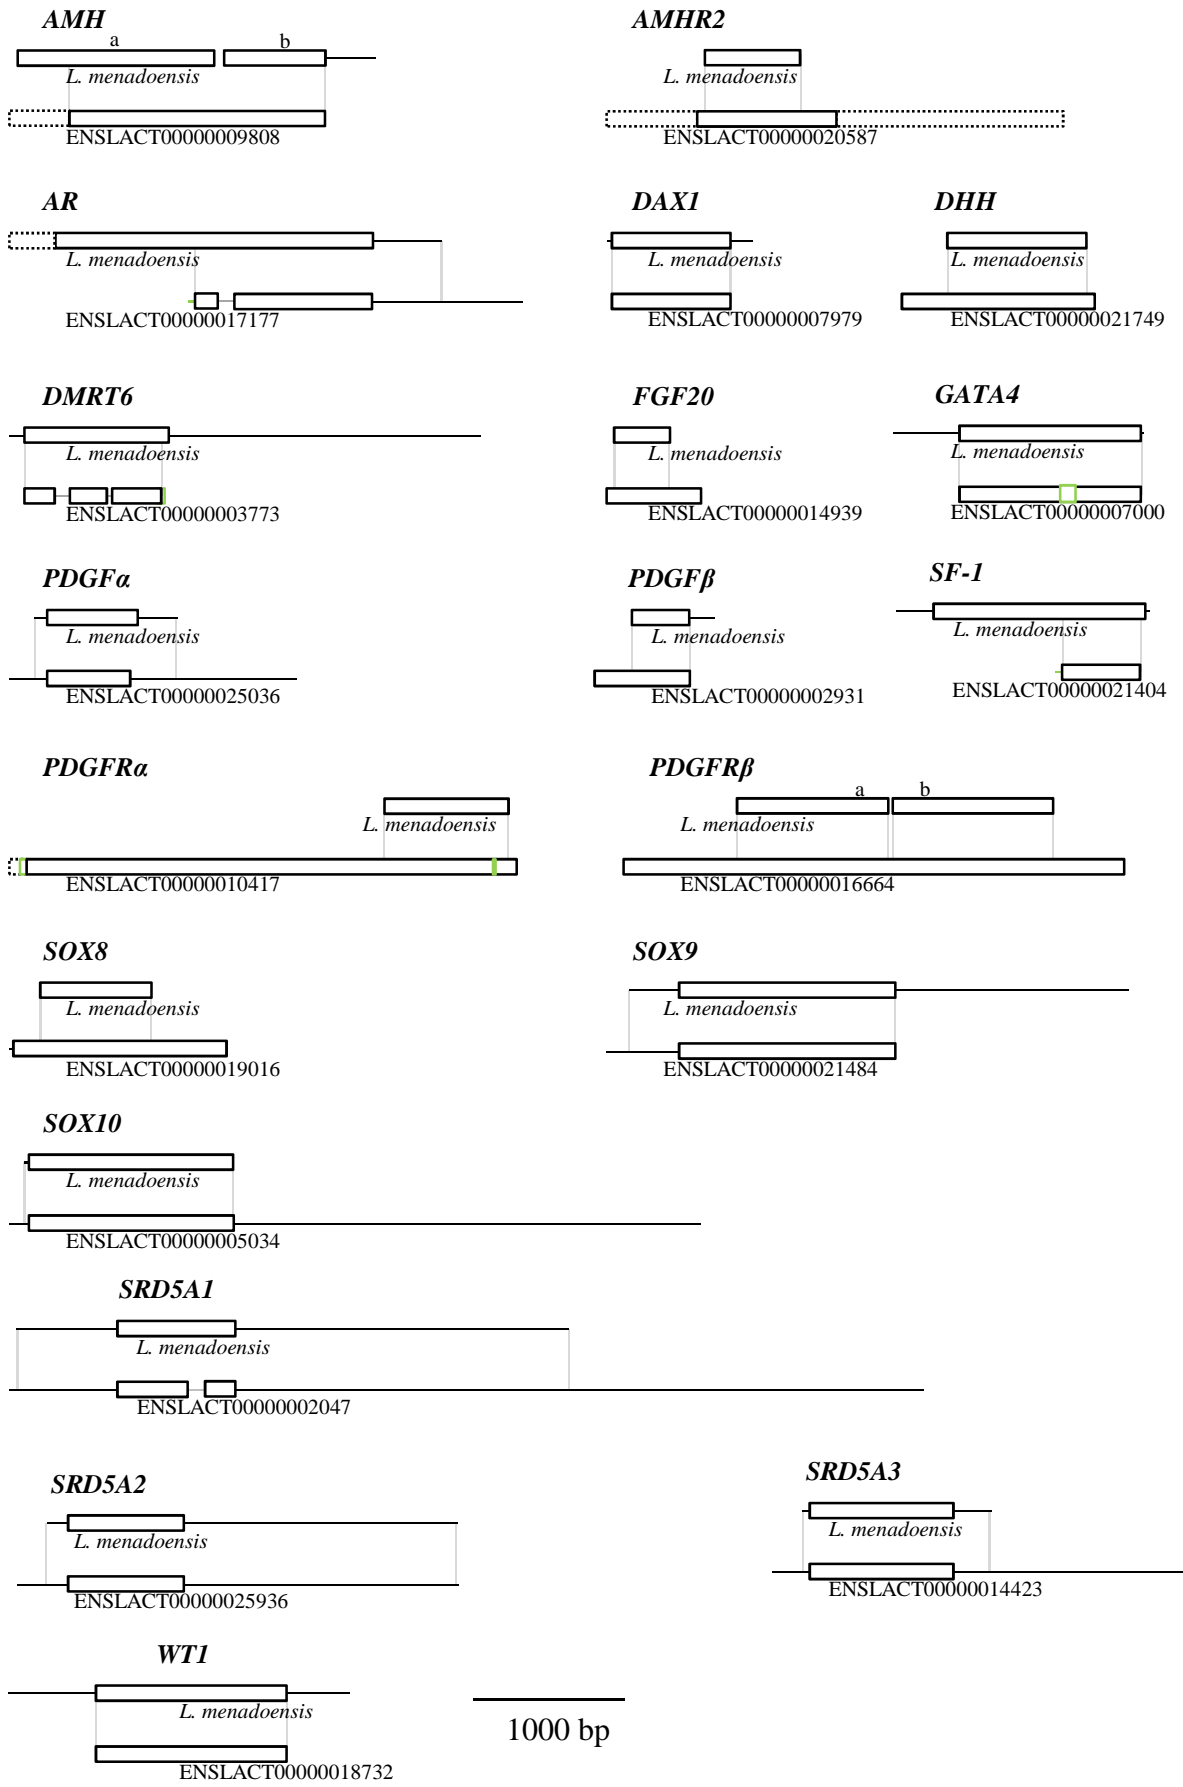

## B Female sex development genes

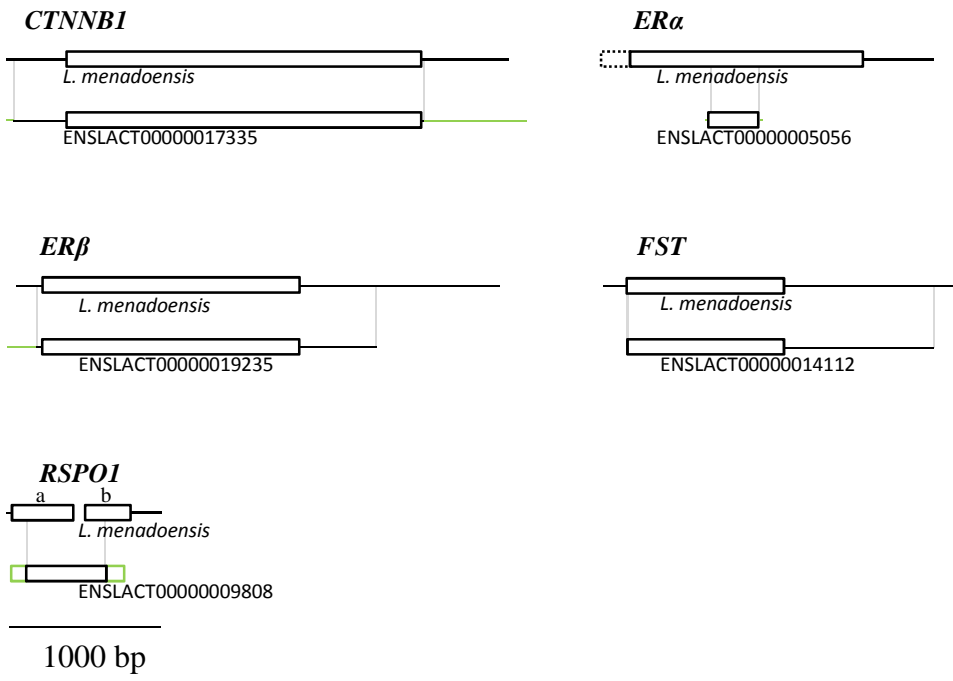

Supplement: pone.0056006.s001.pdf [file pone.0056006.s001.pdf]
