# Supplementary material for: Characterization of Sex Determination and Sex Differentiation Genes in Latimeria
Source: PubMed Central journal article supplement (PMC3636272; doi:10.1371/journal.pone.0056006), 2013-04-25

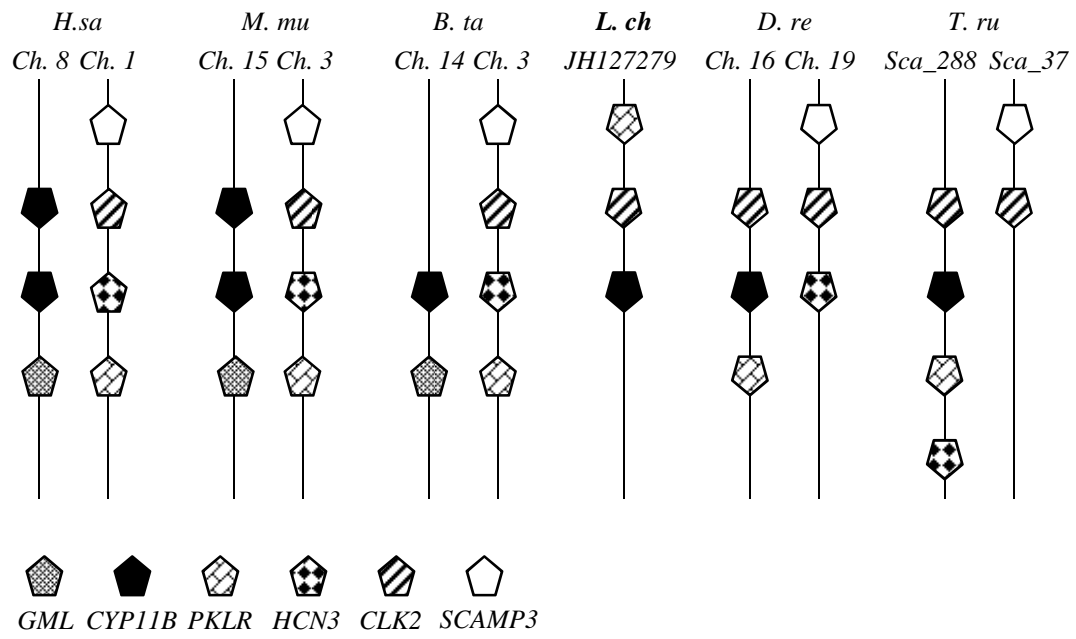

Supplement: pone.0056006.s002.pdf [file pone.0056006.s002.pdf]
