# Supplementary material for: Characterization of Sex Determination and Sex Differentiation Genes in Latimeria
Source: PubMed Central journal article supplement (PMC3636272; doi:10.1371/journal.pone.0056006), 2013-04-25
Supplement: pone.0056006.s003.pdf [file pone.0056006.s003.pdf]

**Table S1** Gene ontologies, comparison with selected vertebrates

| <b>GO0007530<br/>(Sex determination)</b> | <b>Total<br/>annotations</b> | <b>Matching<br/>annotations</b> | <b><i>L. menadoensis</i><br/>orthologs</b> |
|------------------------------------------|------------------------------|---------------------------------|--------------------------------------------|
| <i>Danio rerio</i>                       | 2                            | 2                               | 2                                          |
| <i>Xenopus laevis</i>                    | 3                            | 3                               | 2                                          |
| <i>Gallus gallus</i>                     | 27                           | 27                              | 13                                         |
| <i>Canis familiaris</i>                  | 19                           | 4                               | 4                                          |
| <i>Sus scrofa</i>                        | 17                           | 19                              | 15                                         |
| <i>Bos taurus</i>                        | 12                           | 12                              | 11                                         |
| <i>Mus musculus</i>                      | 21                           | 3                               | 3                                          |
| <i>Rattus norvegicus</i>                 | 26                           | 25                              | 18                                         |
| <i>Homo sapiens</i>                      | 33                           | 31                              | 20                                         |
