# Supplementary material for: Characterization of Sex Determination and Sex Differentiation Genes in Latimeria
Source: PubMed Central journal article supplement (PMC3636272; doi:10.1371/journal.pone.0056006), 2013-04-25
Supplement: pone.0056006.s004.pdf [file pone.0056006.s004.pdf]

**Table S2** Gene ontologies, comparison with selected vertebrates

| <b>GO0007548<br/>(Sex differentiation)</b> | <b>Total<br/>annotations</b> | <b>Matching<br/>annotations</b> | <b><i>L. menadoensis</i><br/>orthologs</b> |
|--------------------------------------------|------------------------------|---------------------------------|--------------------------------------------|
| <i>Danio rerio</i>                         | 43                           | 43                              | 24                                         |
| <i>Xenopus laevis</i>                      | 4                            | 4                               | 3                                          |
| <i>Gallus gallus</i>                       | 187                          | 187                             | 124                                        |
| <i>Canis familiaris</i>                    | 172                          | 33                              | 28                                         |
| <i>Sus scrofa</i>                          | 144                          | 143                             | 117                                        |
| <i>Bos taurus</i>                          | 151                          | 147                             | 118                                        |
| <i>Mus musculus</i>                        | 203                          | 32                              | 30                                         |
| <i>Rattus norvegicus</i>                   | 299                          | 291                             | 240                                        |
| <i>Homo sapiens</i>                        | 373                          | 363                             | 221                                        |
